# Supplementary material for: Facing the urban–rural gap in patients with chronic kidney disease: Evidence from inpatients with urban or rural medical insurance in central China
Source: PLOS journal article supplement (doi:10.1371/journal.pone.0209259), 2018-12-31
Supplement: S1 (10.1371/journal.pone.0209259.s001) [file journal.pone.0209259.s001]

**S1 Table. Introduction for CKD stages.**

Stages of chronic kidney disease, as defined by the Kidney Disease Outcomes Quality

Initiative

| <b>Description</b>               | <b>GFR (ml / min ·1.73 m2)</b> | <b>Stage of CKD</b> |
|----------------------------------|--------------------------------|---------------------|
| Normal or high                   | ≥90                            | G1                  |
| Mildly decreased                 | 60-89                          | G2                  |
| Mildly to moderately decreased   | 45-59                          | G3a                 |
| Moderately to severely decreased | 30-44                          | G3b                 |
| Severely decreased               | 15-29                          | G4                  |
| Kidney failure                   | <15                            | G5                  |

**GFR: estimating glomerular filtration rate category**
